# Supplementary material for: Novel complex of HAT protein TIP60 and nuclear receptor PXR promotes cell migration and adhesion
Source: PubMed Central journal article supplement (PMC5473911; doi:10.1038/s41598-017-03783-w), 2017-06-16
Supplement: 41598_2017_3783_MOESM1_ESM.pdf [file 41598_2017_3783_MOESM1_ESM.pdf]

**Title: Novel complex of HAT protein TIP60 and nuclear receptor PXR promotes cell migration and adhesion**

**Authors:** Karishma Bakshi<sup>1</sup>, Ranjitha B<sup>1</sup>, Shraddha Dubey<sup>1</sup>, Jaisri Jagannadham<sup>1</sup>, Bharti Jaiswal<sup>1</sup>, Ashish Gupta<sup>1\*</sup>

**Figure legends**

**Supplementary Figure S1: Intracellular localization of RFP-TIP60 & GFP-PXR in various cell lines.** Graphs show the percentage intracellular localization of RFP-TIP60 and GFP-PXR proteins in various cell lines as indicated. Cells were transfected with RFP-TIP60 and GFP-PXR plasmids alone or together and at least 100 transfected cells were counted in each case. Graphs represent the average values of three independent experiments with  $\pm$ SD

**Supplementary Figure S2: Expression and purification of recombinant proteins from bacteria.** *E.coli* BL21 DE3 codon plus cells were transformed with pET28a-TIP60 or pGEX6P2-PXR plasmids. IPTG was used to induce the production of recombinant proteins followed by affinity purification method as mentioned in material and method section. Coomassie gel shows the expression and purification profile of recombinant proteins. Asterisk shows the purified protein band of recombinant proteins.

**Supplementary Figure S3: Western blot for TIP60 knockdown.** Cells were transfected with siTIP60 or siGL2 followed by transfection with GFP-PXR. Immunoblotting was performed using anti-TIP60 or anti- $\beta$  actin antibody for the samples as indicated.

**Supplementary Figure S4: Multiple sequence alignment of different members of class II NRs.** Clustal omega analysis was performed to identify sequence similarity between different class II NRs protein sequence. Red highlighted residue shows the corresponding amino acids to PXR lysine 170 and yellow highlighted residue shows the corresponding amino acids to PXR 174-210 region in other class II NRs.

**Supplementary Figure S5: Immunoblots showing expression of tagged proteins.** (A) For promoter reporter assay cells were transfected with plasmids as indicated. Lysates of the transfected cells were resolved followed by Western blotting with the indicated antibody. (B), (C), (D) & (E) shows the expression of tagged proteins by immunoblotting by indicated antibody in scratch assay, cell adhesion assay, cell proliferation assay and cell invasion assay respectively.

**Supplementary Figure S6: Full-length immunoblots.** Full-length blot images with indicated antibody.

**Supplementary Figure S1: Graphs depicting TIP60-mediated nuclear reorganization of unliganded PXR in various cell lines.**

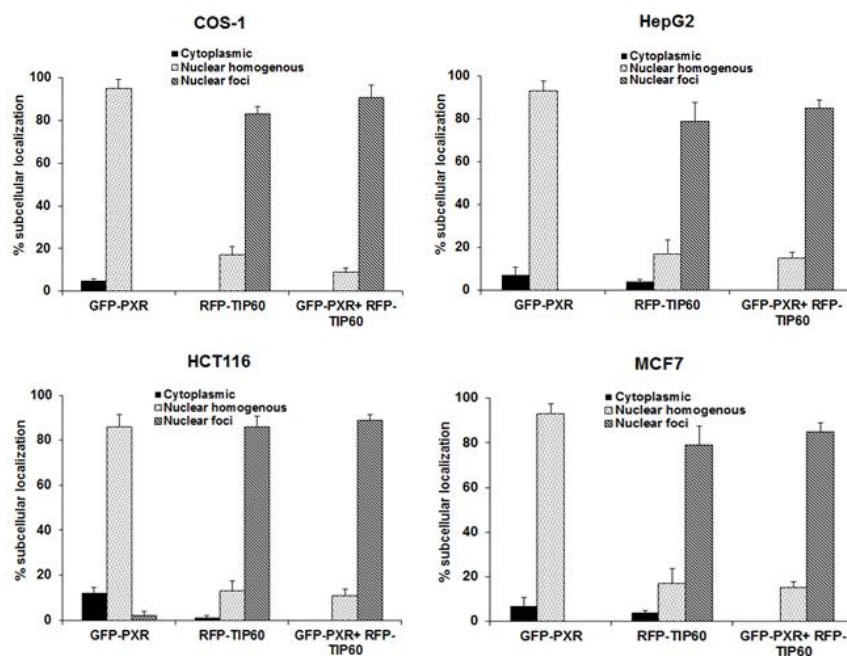

**Supplementary Figure S2: Expression and purification of His-TIP60 and GST-PXR recombinant proteins from *E. coli***

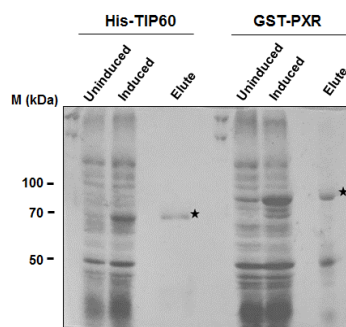

**Supplementary Figure S3: Western blot of TIP60 knockdown**

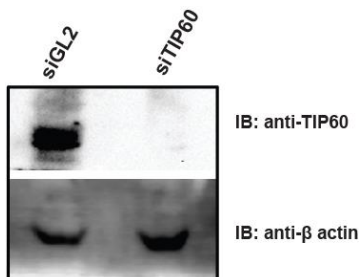

## Supplementary Figure S4: Multiple sequence alignment of class II NRs

```

CAR human          -----MELLEEDLTCPICCSLFDDP-----
TSH human          -----
PPARα human       ---MVD---TESPLCPLSP-----LEAGDLESPLSEEFLQE-MGNIQ
PPARγ human       -----SSISTPHYED-----
RXR human          -----
PXR human          -----
VDR human          -----
FXR human          MVMQFQGLNPIQISPHCSCTPSGFFMEMMSMKPAKGVLTEQVAGPLGQNLEVEPYSQYS
LXR human          -----MS-SPTTSS---LDTPLPGNGPPQ-----

CAR human          -----RVL---PCSHNFCKKCLEGILEGSVRNSLWRPAPF-KCPTCRKETSATGINSLQV
TSH human          -----MEQ-----KP-----SKVEC--
PPARα human       EISQSI---GEDSSGSFGFTEYQY----LGSCPGSDGSVI-----TDTLSP--
PPARγ human       -IPFTR---TDP---VVADYKY----DLKLEQYQSAI-----KVPE--
RXR human          -----
PXR human          -----MEV-----RPKESWNHAD-----FVH--
VDR human          -----MEA-----
FXR human          NVQFPQVQPQISSSSYSNLGFYP----QQPEEWYSPGIYELRRMPAETLYQGTEV--
LXR human          -----PGAPS---SSPTVKE---EGPEPWPGGPDVPGTDEASSACSTDWV--

CAR human          NYSLKGIVEKYKIKISPKMPVCKGHLG---QPLNIFCLTDMQLICGICATRGE--HTK
TSH human          ---GSDPEENSARSPDGKRKRKNGQCSLKTSMGYIPSYLDKDEQCVVCGDKATGYHYR
PPARα human       ---ASSPSS---VTY--PVVPGS-----VDESPGALNIECRI CGDKASGYHYG
PPARγ human       ---ASPPYY---SEKTQLYNKP-----HEEPSNSLMAIECRVCGDKASGFHYG
RXR human          -----
PXR human          ---CEDTES---VPGKPSVNA-----D---EEVGGPQICRVCGDKATGYHFN
VDR human          ---MAASTS---LP---DPG-----D---FDRNVPRICGVCGDRATGFHFN
FXR human          ---AEM--P---VTKKPRMGAS-----A---GRIKGDLECVVCGDRASGYHYN
LXR human          ---IPDPEE---EPERKRKKGKGP-----A---PKMLGHEL CRVCGDKASGFHYN

CAR human          HVFCSIEDAYAQERDA-----FESLF---QSFETWRRGDALSRLDT-LETSKRKSLO
TSH human          CITCEGCKGFFRRTIQKNLHPTYSCY-DSCCVIDKITRNQCQLCRFKKCIAVGMAMDLV
PPARα human       VHACEGCKGFFRRTIRLK--LVYDKC--DRSCKIQKKNRNCQYCRFHKCLSVGMSHNAI
PPARγ human       VHACEGCKGFFRRTIRLK--LIYDRC--DLNCR IHKKS RNKCQYCRFQKCLAVGMSHNAI
RXR human          -----
PXR human          VMTCEGCKGFFRRAMKRN--ARLRCPFRKGACEITRKTRQCQACRLRKCLES GMKKEMI
VDR human          AMTCEGCKGFFRRSMKRK--ALFTCPFN-GDCRITKDNRRHCQACRLKRCVDIGMMKEFI
FXR human          ALTCEGCKGFFRRSITKN--AVYKCKN-GGNCVMDMYMRKQCERLRKCKEMGMLAECM
LXR human          VLSCEGCKGFFRRSVVRGGARRYACRG-GGTCQMDAFMRRKQCQRLRKC KEAGMREQCV

CAR human          LLTKDSDK--VKEFF-EKL-----QHTLD-----Q
TSH human          LDDSKRVA--KRKLIEQNRERRRKEEMIRSL-----Q
PPARα human       RFGMRPRS--EKAKLKAEILTC---EHDIED-----
PPARγ human       RFGRMPQA--EKEKLLAEISS---DIDQLN-----
RXR human          -----
PXR human          MSDEAVEE--RRALIKRKSERT---GTQPLGV-----
VDR human          LTDEEVQR--KREMILKRKEEEA---LKDSL-R-----
FXR human          YTGLLTEIQCKSKRLRKNVKQHADQ-TV---NE---DSEGRDLRQ---VTSTTKSCR
LXR human          LSEE---QIRKKKIRKQQESQSQ-SQSPVGPQGSSSSASGPGASPGGSEAGSQSGEG

CAR human          KKNEILSDFETMKLAVMQAYDPEINKLNTILQEQRFMAFNIAEAFKDVSEPIVFLQQMQEF
TSH human          QRPEPTPEEWDLIHIATEA-----HRSTNAQGSHWQ-----RKF
PPARα human       ---SETADLKS LAKRIYEA-----YLKNFNM--NKVK-----ARVI
PPARγ human       ---PESADLRALAKHLYDS-----YIKSFPL--TKAK-----ARAI
RXR human          -----
PXR human          --QGLTEEQRMMIRELMDA-----QMKTFTD--TFSH-----FKNF
VDR human          --PKLSEEQRRI IAILLDA-----HHKTYDP--TYS-----FCQF
FXR human          EKTELTDPDQQTLLHFIMD-----SYNK-----QR--
LXR human          EGVQLTAAQELMIQQLVAA-----QLQCNKR--SFSD-----QPKV

CAR human          REKIKVIKETPLPP-----SNLPASPLMKNFDTSQWE
TSH human          -LPDD-----IGQS
PPARα human       ---L-SGKA-----SNNPPFVIHDMETLCMA-----EKT LVAK
PPARγ human       ---L-TGKT-----TDKSPFVIYDMNSLMMG-----EDKIKFK
RXR human          -----

```

FXR human RLPGLVSSGCELPESLQAPSREEAAKWSQVRKDLCSLKVSLQL-----RGEDGSVW-  
VDR human RPPVRVNDGGGSHPSR--PNSRHTPSFSGDSSSSCSDHCITSSDMMSSSFSNLDLSEE-  
FXR human -----MPQ-  
LXR human -----TPW-

CAR human DIKLVVDVKLSLPQDTGTGTFISKI PWSFYKFLFLILLGLVIVFG--PTMFLEWSLFDDLA  
TSH human PI-VSMPD-----GDKVDLEAFSEFTK-IITPAITRVVDFAKKLPMFSELPCEDQII  
PPAR $\alpha$  human L-VANGIQ-----NKEAEVRI FHCCQC-TSVETVTELEFAKAI PGFANLDLNDQVT  
PPAR $\gamma$  human HITPLQEIQ-----SKEVAIRIFQGCQF-RSVEAVQEITEYAKSIPGFVNLDLNDQVT  
RXR human -----PLDDQVI  
FXR human NYKPPADS-----GGKEIFSLPHMAD-MSTYMFKGIISFAKVISYFRDLPIEDQIS  
VDR human DSDDPSVT-----LELSQLSMLPHLAD-LVYSIQKVI GF AKMI PGFRDLTSEDQIV  
FXR human EITNKILK-----EEFSAEENFILTE-MATNHVQVLFVFTKLPGFQTLDHEDQIA  
LXR human PLGA-DPQ-----SRDARQQRFAHFTE-LAIISVQEI VDFAKQVPGFLQLGREDAQIA  
\*::

CAR human TWKGCLSNFSSYLTKTADFIEQSVFYWEQVTDGFFIFNERF--KNFTLVVLNNVAEFVCK  
TSH human LLKGCCMEIMSLR-AAVRYDP-ESDTLTLIS-GEMAVKREQLKNGG-LGVVSDAIFELGKS  
PPAR $\alpha$  human LLKYGVYEAIFAM-LSSVMN-KDGLMVAYG-NGFITREFLKS LRKPFCDIMEPKFDFAMK  
PPAR $\gamma$  human LLKYGVHEI IYTM-LASLMN-KDGVLI SEG-QGFMTREFLKS LRKPFDFMEPKFEFAVK  
RXR human LLRAGWNELLIAS-FSHRSI AVK DGI--LLATGLHVHRNSAHSAGVGAIFDRVLTSLVSK  
FXR human LLKGA AFELCQLR-FNTVFN-AETGTWECGRLSYCLE---DTAGGFQQLLEPMLKFHYM  
VDR human LLKSSAIEVIMLR-SNESFT-MDDMSWTCGNQDYKYRVSVDVTKAGHSLELIEPLIKFQVG  
FXR human LLKGS AVEAMFLR-SAEIFN-KKLP SG----HSDLLEERIRNSGISDEYITPMFSFYKS  
LXR human LLKASTIEIMLLE-TARRYN-HETECITFL-KDFTYSKDDFHRAGLQVEFINPIFEFSRA  
: : . : :

CAR human YKLL-----  
TSH human LSAFNLDDEVALLQAVLLMSTDRSGLLCVVKIEKSQEAYLLAFEHYVNRKHNI--PHF  
PPAR $\alpha$  human FNALELDDSDISLFVAAI ICCGDRPGLLN VGHIEKMQEGIVHVLRHLQSNHPDD--IFL  
PPAR $\gamma$  human FNALELDDSDLAIFIAVILS GDRPGLLN VKPIEDI QDNLLQALELQLKLNHPES--SQL  
RXR human MRDMQMDKTELGCLRAIVL FNPDSKGLSNPAEVEALREKVYASLEAYCKHKYPEQ--PGR  
FXR human LKKLQLHEEEYVLMQAISLFS PDRPGVLQHRVVDQLQEQAITLKS YIECNRPQPAHRFL  
VDR human LKKLNLHEEEHVLLMAICIVSPDRPGVQDAALIEAI QDRLSNTLQTYIRCRHPPPGSHLL  
FXR human IGELKMTQEEYALLTAIVILS PDRQYIKDREAVEKLQEPLLDVLQKLCCKIHQPEN--PQH  
LXR human MRRLGLDDAEYALLI AINIFSADRPNVQEPGRVEALQPPYVEALLSYTRIKRPQD--QLR  
:

CAR human -----  
TSH human WPKLLMKEREVQSSILYKGA AAAE---GRPGGSLGVHPEGQQLLGMHVVGPPQVRQLEQQL  
PPAR $\alpha$  human FPKLLQKMDLRQLVTEHAQLVQI IKK-TESDAALHPLLQEIYRDMY-----  
PPAR $\gamma$  human FAKLLQKMTDLRQIVTEHVQLLQVIKK-TETDMSLHPLLQEIYKDLY-----  
RXR human FAKLLRLPALRSIGLKCLEHLFFFKLIGD--TPIDTFMEMLEAPH-----  
FXR human FLKIMAMTELRSINAQHTQRLLRIQD---IHPFATPLMQELFGITG-----  
VDR human YAKMIQKLADLRSLNEEHSKQYRCLSFQPECSMKLTPLVLEVFGEI-----  
FXR human FACLLGRLELRTFNHHHAEMLSWRV---NDHKFTPLLCEIWDVQ-----  
LXR human FPRMLMKLVSLRTLSSVHSEQVFA LRL---QDKKLPPLLSEIWDVHE-----

CAR human -----  
TSH human GEAGSLQGPVLQHQS PKSPQORLELLHRSGILHARAVCGEDDSSEADSPSSSEEEPEVC  
PPAR $\alpha$  human -----  
PPAR $\gamma$  human -----  
RXR human ---QMT-----  
FXR human ---S-----  
VDR human ---S-----  
FXR human -----  
LXR human -----

CAR human -----  
TSH human EDLAGNAASP  
PPAR $\alpha$  human -----  
PPAR $\gamma$  human -----  
RXR human -----  
FXR human -----  
VDR human -----  
FXR human -----  
LXR human -----

Supplementary Figure S5: Immunoblots showing expression of tagged proteins.

A

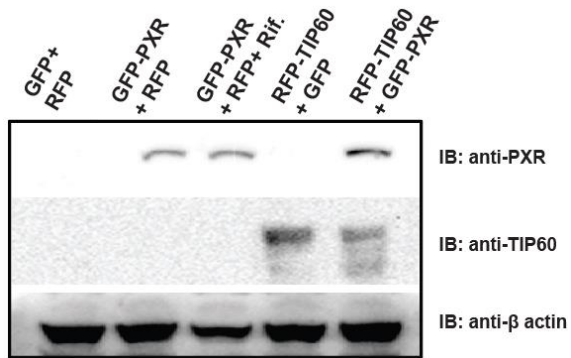

B

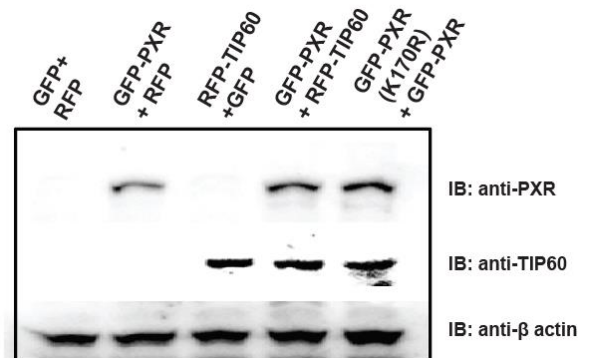

C

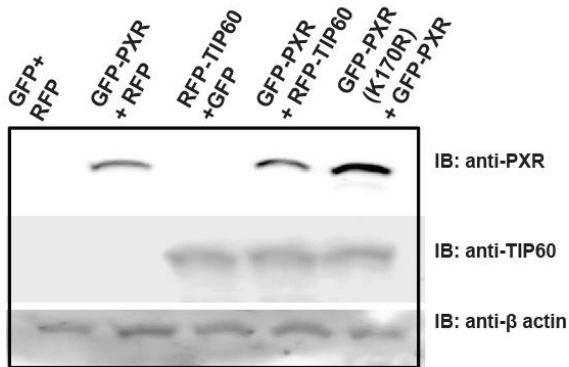

D

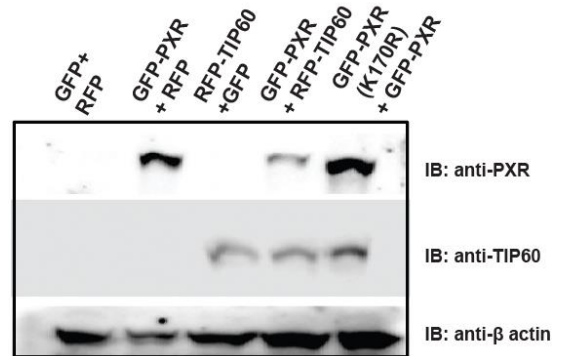

E

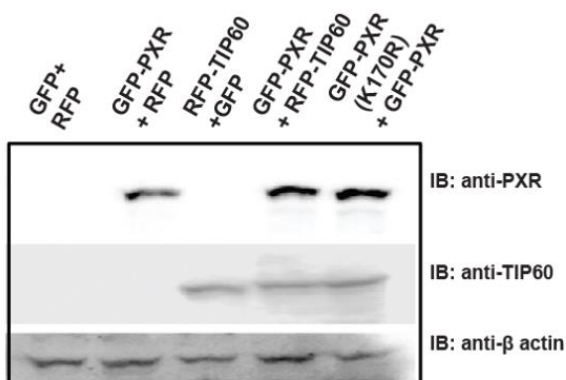

**Supplementary Figure S6: Full-length immunoblots showing expression of proteins.**

**A**

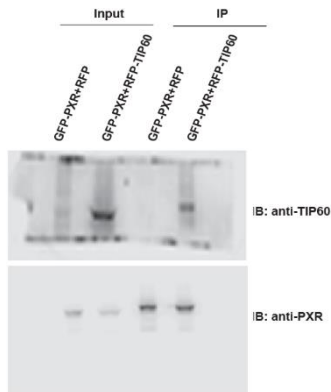

**B**

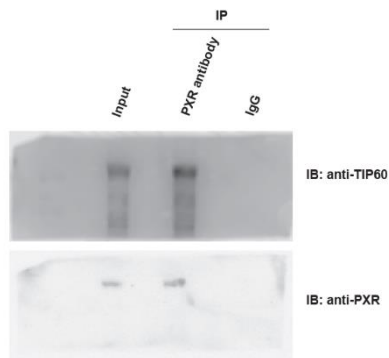

**C**

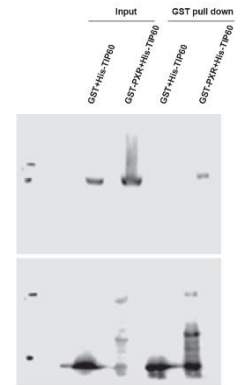

**D**

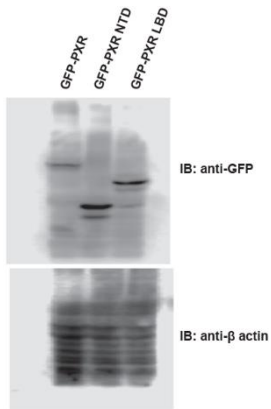

**E**

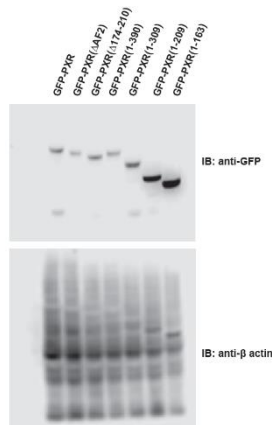

**F**

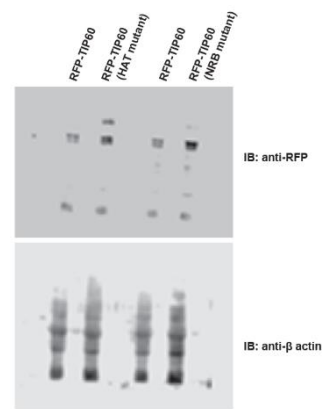

**G**

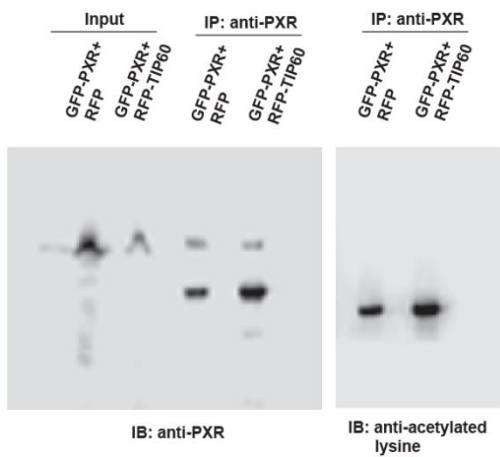

**H**

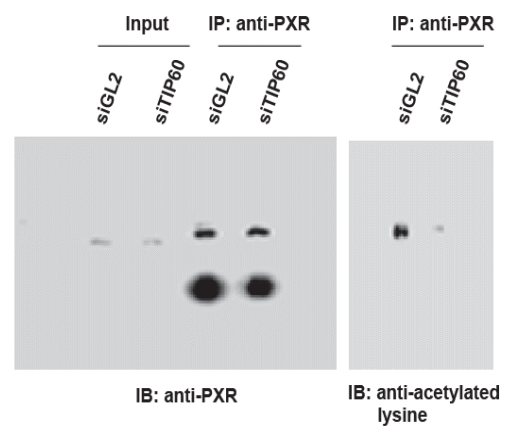

**I**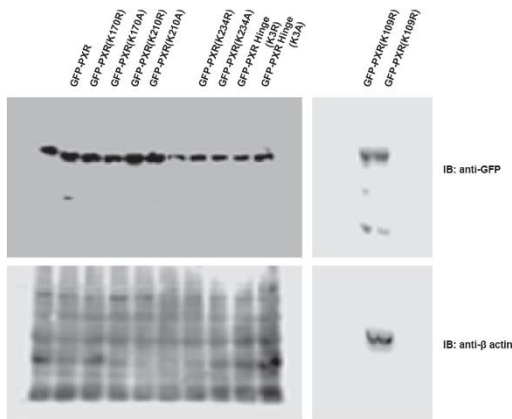**J**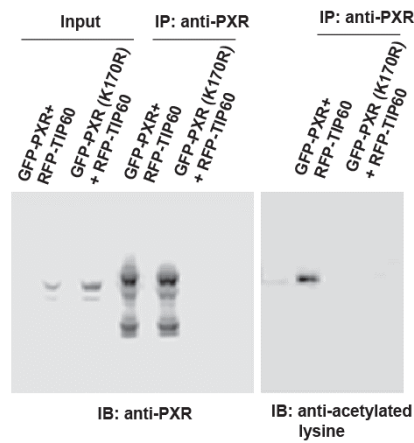**K**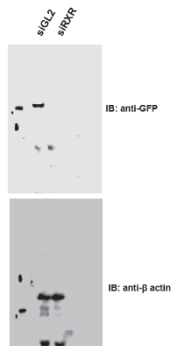**L**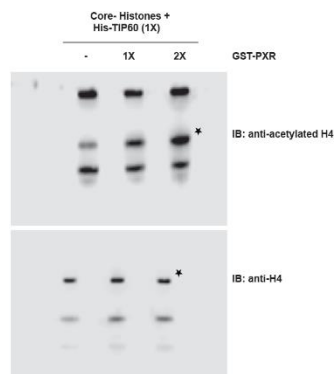**Supplementary Table 1: List of primers used in the study.**

| S.No. | Primer Name         | Sequence (5' to 3')               |
|-------|---------------------|-----------------------------------|
| 1     | hPXR(K109R)Fw       | GAGCGGCATGAAGAGGGAGATGATCATG      |
| 2     | hPXR(K109R)Rv       | CATGATCATCTCCCTCTTCATGCCGCTC      |
| 3     | hPXR(164-210)del Fw | ATGAAAACCTTTGACGTCTCTCTGCAGCTGCGG |
| 4     | hPXR(164-210)del Rv | ATGAAAACCTTTGACGTCTCTCTGCAGCTGCGG |
| 5     | hPXR(174-210)del Fw | TTCAAGAATTTCCGGGTCTCTCTGCAGCTGCGG |
| 6     | hPXR(174-210)del Rv | CTGCAGAGAGACCCGGAAATTCTTGAAAT     |
| 7     | hPXRLBDdel1BamHIRv  | CGGGATCCTCAAAGGTTTTTCATCTGAGCGTC  |
| 8     | hPXRLBDdel2BamHIRv  | CGGGATCCTCAAGAGCACAGATCTTTCCGGA   |
| 9     | hPXRLBDdel3BamHIRv  | CGGGATCCTCACAAGCAGTAGGACAGCCG     |
| 10    | hPXRLBDdel4BamHIRv  | CGGGATCCTCACAAGAACCTATGAGCAGGCT   |
| 11    | hPXRfWkpnI          | GGGGTACCATGCTGGAGGTGAGACCCA       |
| 12    | hTIP60RvEcoRI       | CGGAATTCCACTTCCCCCTCTTGCT         |
| 13    | hPXRdelAF2RvBamHI   | CGGGATCCTCACGTAGCAAAGGGGTGT       |

|    |                     |                                                                                             |
|----|---------------------|---------------------------------------------------------------------------------------------|
| 14 | hPXRfWbamHI         | CGGGATCCATGCTGGAGGTGAGACCCA                                                                 |
| 15 | hPXRrvEcoRI         | CGGAATTCTCAGCTACCTGTGATGCCG                                                                 |
| 16 | hTIP60HATmutFw      | ACCCTGCCTCCCTACGAGCGCCGGGAGTACGGCAAG                                                        |
| 17 | hTIP60HATmutRv      | CAGCAGCTTGCCGTACTCCCGGCGCTCGTAGGGAGG                                                        |
| 18 | hPXRNLsmutK66Fw     | TGCAAGGGCTTTTTTCGCGGCGGCCATGAAACG                                                           |
| 19 | hPXRNLsmutK66Rv     | GTTGCGTTTCATGGCCGCCGCGAAAAAGC                                                               |
| 20 | hPXRNLsmutK91Fw     | ATCACCCGGAAGACCGCGGCACAGTGCCAG                                                              |
| 21 | hPXRNLsmutK91Rv     | GCAGGCCTGGCACTGTGCCGCGGTCTTCCG                                                              |
| 22 | HsPXRNtermFwEcoRI   | CGGAATTCATGCTGGAGGTGAGACCCA                                                                 |
| 23 | HsPXRNtermRvBamHI   | CGGGATCCTCAACTTTTCTTCCGCTTGATC                                                              |
| 24 | HsPXRLBDFwEcoRI     | CGGAATTCATGACAGAGGAGCAGCGGA                                                                 |
| 25 | HsPXRLBDRvBamHI     | CGGGATCCTCAGCTACCTGTGATGCCG                                                                 |
| 26 | hPXRHingeK3RmutFw   | AGGCGGGCCTTGATCAGGCGGAGGAGGAGTGAACG                                                         |
| 27 | hPXRHingeK3RmutRv   | CCCTGTCCGTTCACTCCTCCTCCGCCTGATCAAGG                                                         |
| 28 | hPXRK170RmutFw      | ACCTTCTCCCATTTTCAGGAATTTCCGG                                                                |
| 29 | hPXRK170RmutRv      | TGGCAGCCGGAAATTCCTGAAATGGGA                                                                 |
| 30 | hPXRK210RmutFw      | GATCTGTGCTCTTTGAGGGTCTCTCTG                                                                 |
| 31 | hPXRK210RmutRv      | CAGCTGCAGAGAGACCCTCAAAGAGCA                                                                 |
| 32 | hPXRK234RmutFw      | GCCGACAGTGGCGGGAGGGAGATCTTC                                                                 |
| 33 | hPXRK234RmutRv      | CAGGGAGAAGATCTCCCTCCCGCCACT                                                                 |
| 34 | hPXRHingeK3AmutFw   | AGGCGGGCCTTGATCGCGCGGGCGGCAAGTGAACG                                                         |
| 35 | hPXRHingeK3AmutRv   | CCCTGTCCGTTCACTTGCCGCCCGCGCGATCAAGG                                                         |
| 36 | hPXRK170AmutFw      | ACCTTCTCCCATTTTCGCGAATTTCCGG                                                                |
| 37 | hPXRK170AmutRv      | TGGCAGCCGGAAATTCGCGAAATGGGA                                                                 |
| 38 | hPXRK210AmutFw      | GATCTGTGCTCTTTGGCGGTCTCTCTG                                                                 |
| 39 | hPXRK210AmutRv      | CAGCTGCAGAGAGACCGCCAAAGAGCA                                                                 |
| 40 | hPXRK234AmutFw      | GCCGACAGTGGCGGGGCAGAGATCTTC                                                                 |
| 41 | hPXRK234AmutRv      | CAGGGAGAAGATCTCTGCCCCGCCACT                                                                 |
| 42 | hTIP60FwBamHI       | CGGGATCCATGGCGGAGGTGGGGGAG                                                                  |
| 43 | hTIP60NRBmutRvEcoRI | CGGAATTCTCACCCTTCCCCCTCTTGCTCCAGTCCCTTGGGAGTC<br>GTGCAGACACTTGAGTTCGATCCGCGCGGCCCGCTTGAGCAT |
| 44 | hRXRFw              | CGGAATTCATGGACACCAAACATTTCTCTG                                                              |
| 45 | hRXRRv              | GGGGTACCAGTCATTTGGTGCGGGC                                                                   |
